# Supplementary material for: Single cell detection using intracellularly-grown-Au-nanoparticle based surface-enhanced Raman scattering spectroscopy for nasopharyngeal cell line classification
Source: Royal Society of Chemistry journal article supplement (doi:10.1039/d1ay00554e), 2021-01-01
Supplement: d1ay00554e1.pdf [file d1ay00554e1.pdf]

## Supplementary information

### Single cell detection using intracellularly-grown-Au-nanoparticles based surface-enhanced Raman scattering spectroscopy for nasopharyngeal cell lines classification

Weiwei Chen,<sup>a,†</sup> Shangwen Xu,<sup>b,†</sup> Xiaoyang Wang,<sup>b</sup> Guoqiang Wei,<sup>a</sup> Quanxing Hong,<sup>a</sup> Hao Huang<sup>\*a</sup> and Yun Yu,<sup>\*a</sup>

<sup>a</sup> College of Integrated Traditional Chinese and Western Medicine, Fujian University of Traditional Chinese Medicine, Fuzhou, 350122, China.

\*Corresponding author. E-mail: [cfjtcmm@126.com](mailto:cfjtcmm@126.com) (H. Huang); [yuyunsatan@163.com](mailto:yuyunsatan@163.com) (Y. Yu).

<sup>b</sup> Department of Medical Imaging, Fuzhou General Hospital, Fuzhou, 350025, China

<sup>†</sup> W. Chen and S. Xu contributed equally to this work.

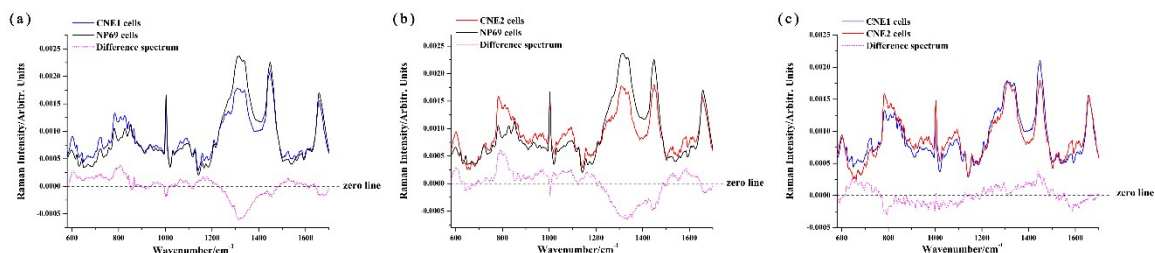

Fig. S1. Comparison of normalized mean Raman spectra from CNE1, CNE2, and NP69 cells.

(a) CNE1 cells vs. NP69 cells; (b) CNE2 cells vs. NP69 cells; (c) CNE1 cells vs. CNE2 cells.

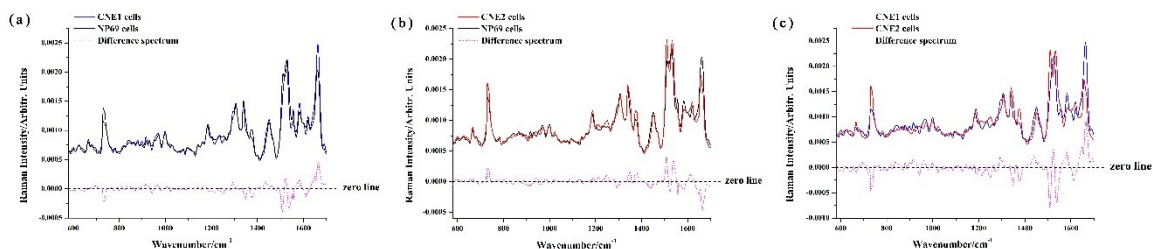

Fig. S2. Comparison of normalized mean SERS spectra from CNE1, CNE2 and NP69 cells.

(a) CNE1 cells vs. NP69 cells; (b) CNE2 cells vs. NP69 cells; (c) CNE1 cells vs. CNE2 cells.
